# Supplementary material
Source: publisher site journal article supplement (https://www.dovepress.com/article/544464)
Supplement: Supplementary file 1 [file 544464%20Supplementary%20Material.docx]

Table S1 The qPCR primers

| **Genes** | **Primers** | |
| --- | --- | --- |
| OSBPL8 F | CGCACGGGATTTGCAGATTT | |
| OSBPL8 R | TTTCCTTGGCGCTGACTCAT | |
| SLC16A3 F | GAGCCTGAGAAAAACGGGGA |
| SLC16A3 R | CTGGAATGACACGGTTCCCA |
| CREB5 F | CCCTGCCCAACCCTACAATG |
| CREB5 R | GGACCTTGCATCCCCATGAT |
| LRWD1 F | GGACCTGTCAGGATTGGAGC |
| LRWD1 R | GTGGGCAGGAGAAAGGAGAC |
| GAPDH F | CGAAGGTGGAGTCAACGGATTT |
| GAPDH R | ATGGGTGGAATCATATTGGAAC |


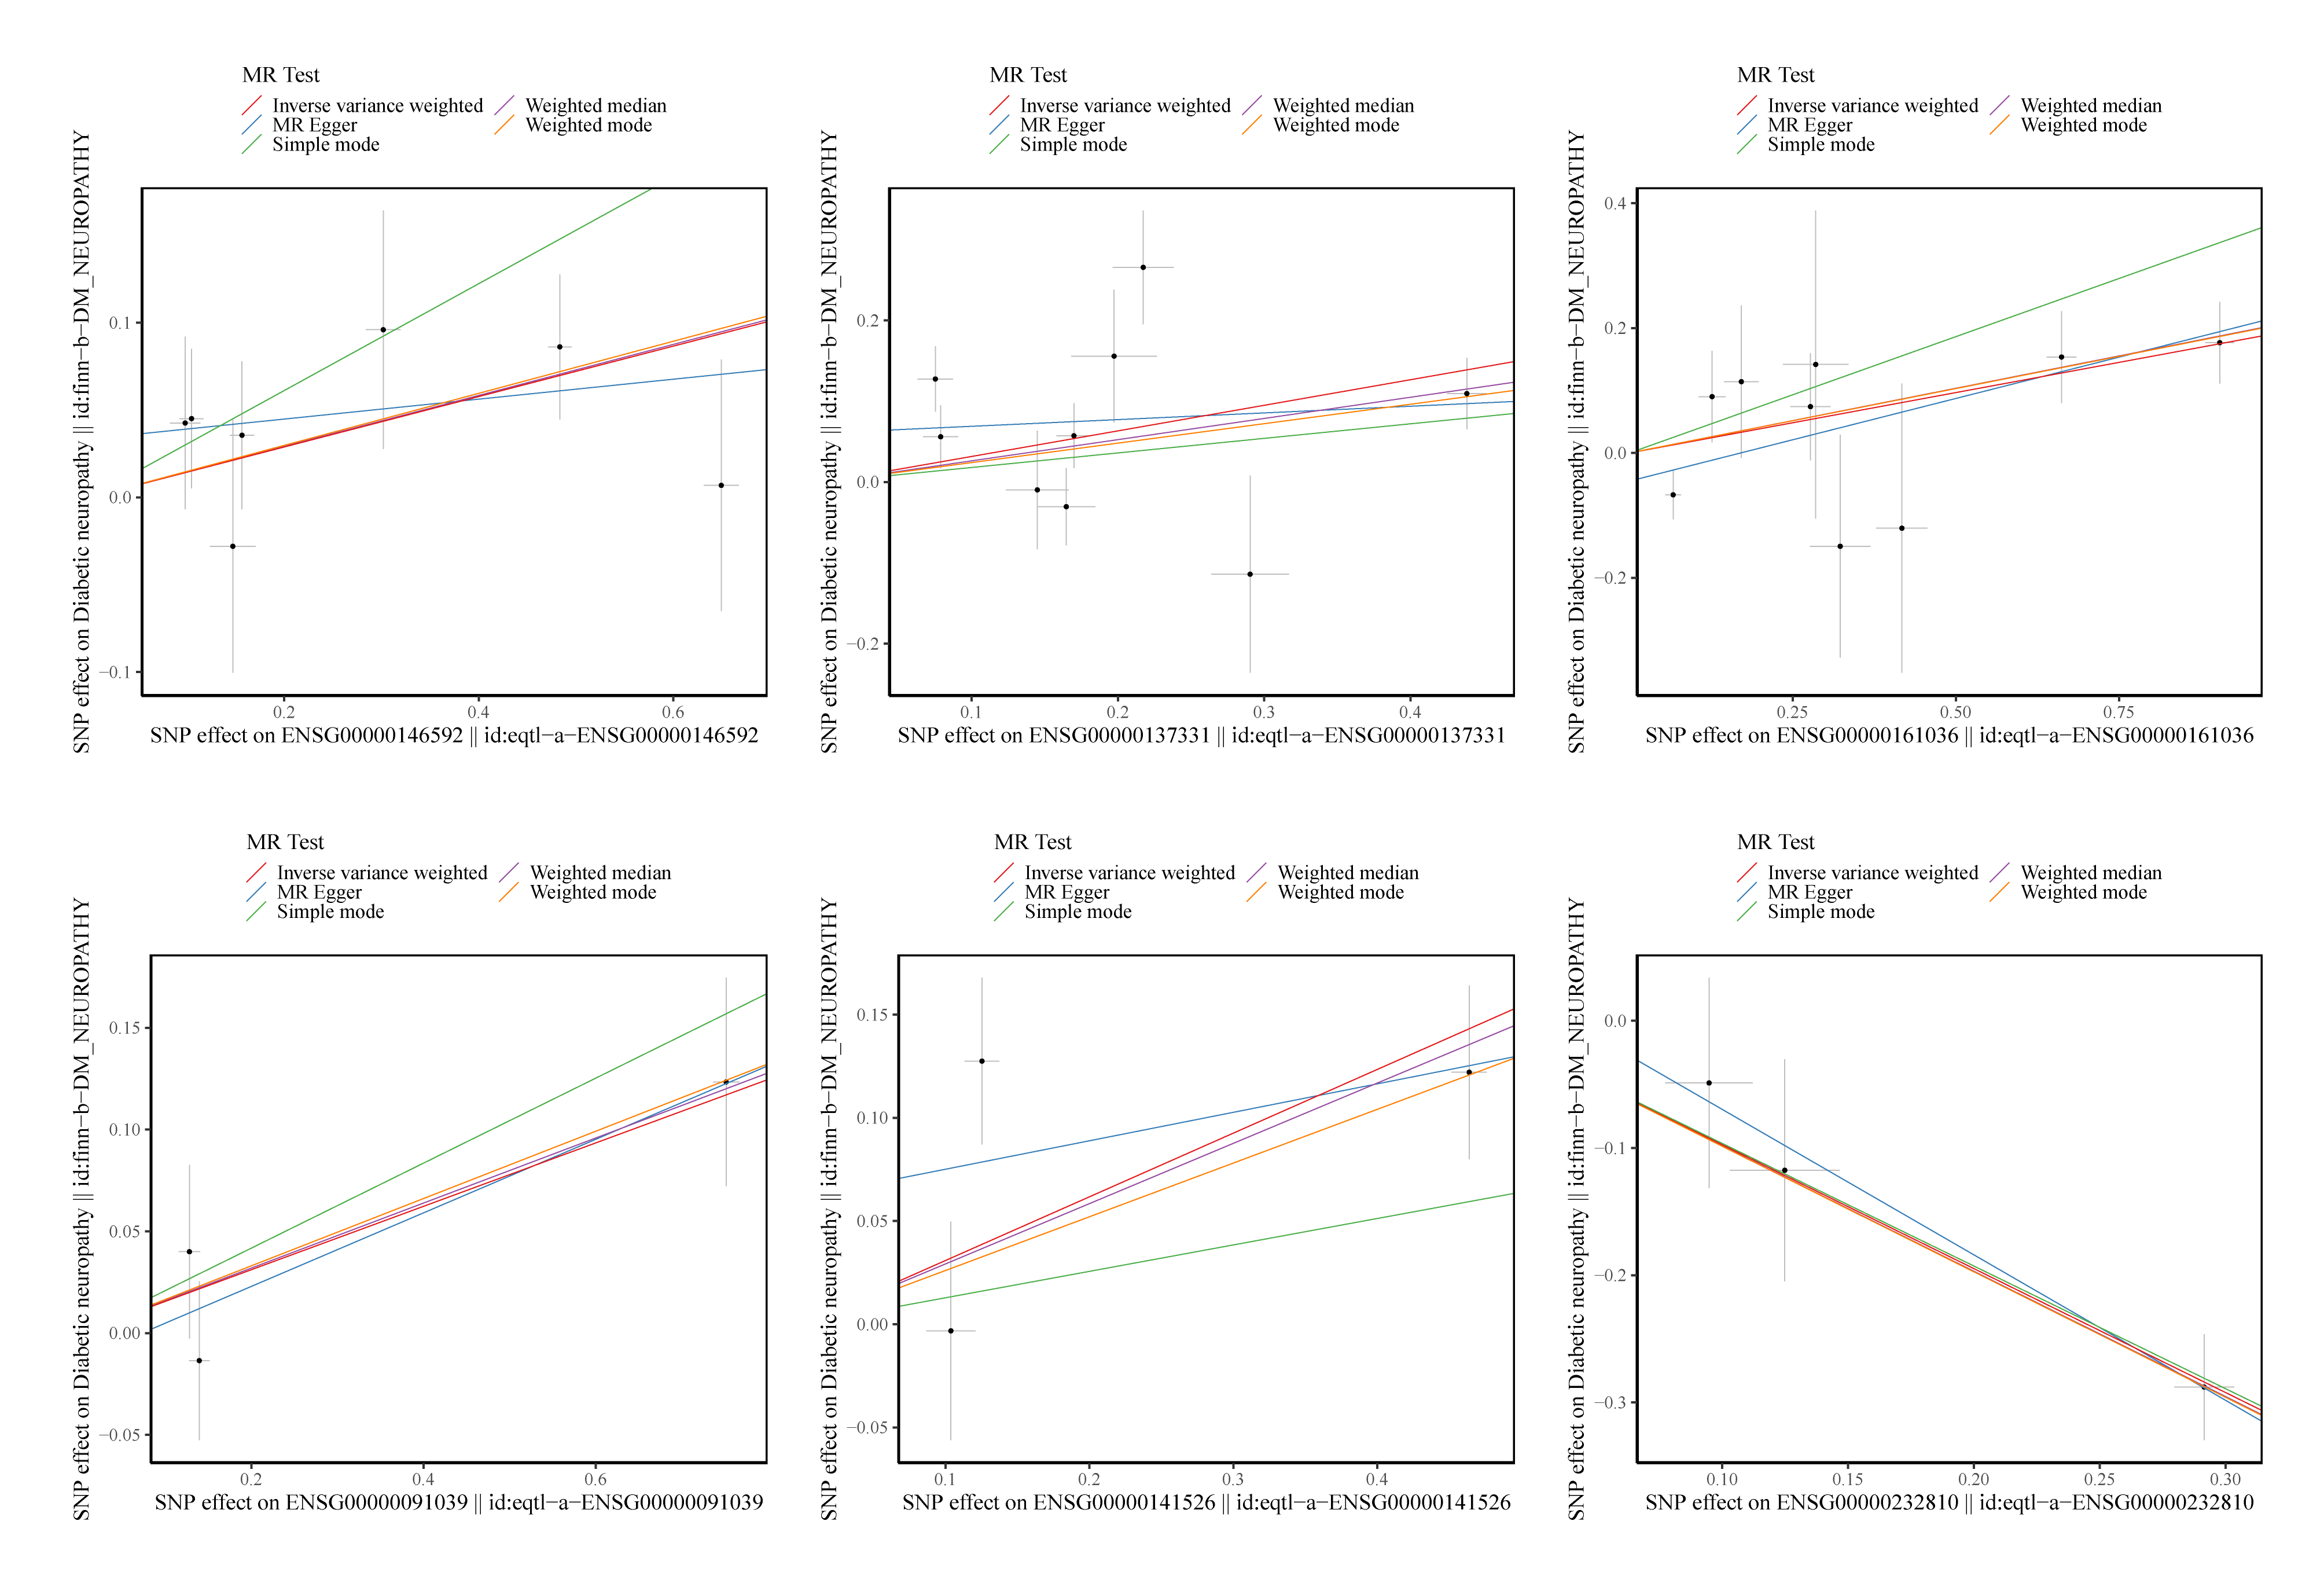


**Figure S1** The Scatter plots for the causal association between biomarkers (CREB5, IER3, LRWD1, OSBPL8, SLC16A3,TNF) and DNP. The colored lines in the figure represent the fitting results of the different algorithms of forward MR. A positive slope of the line indicates a risk factor and a negative slope indicates a safety factor.


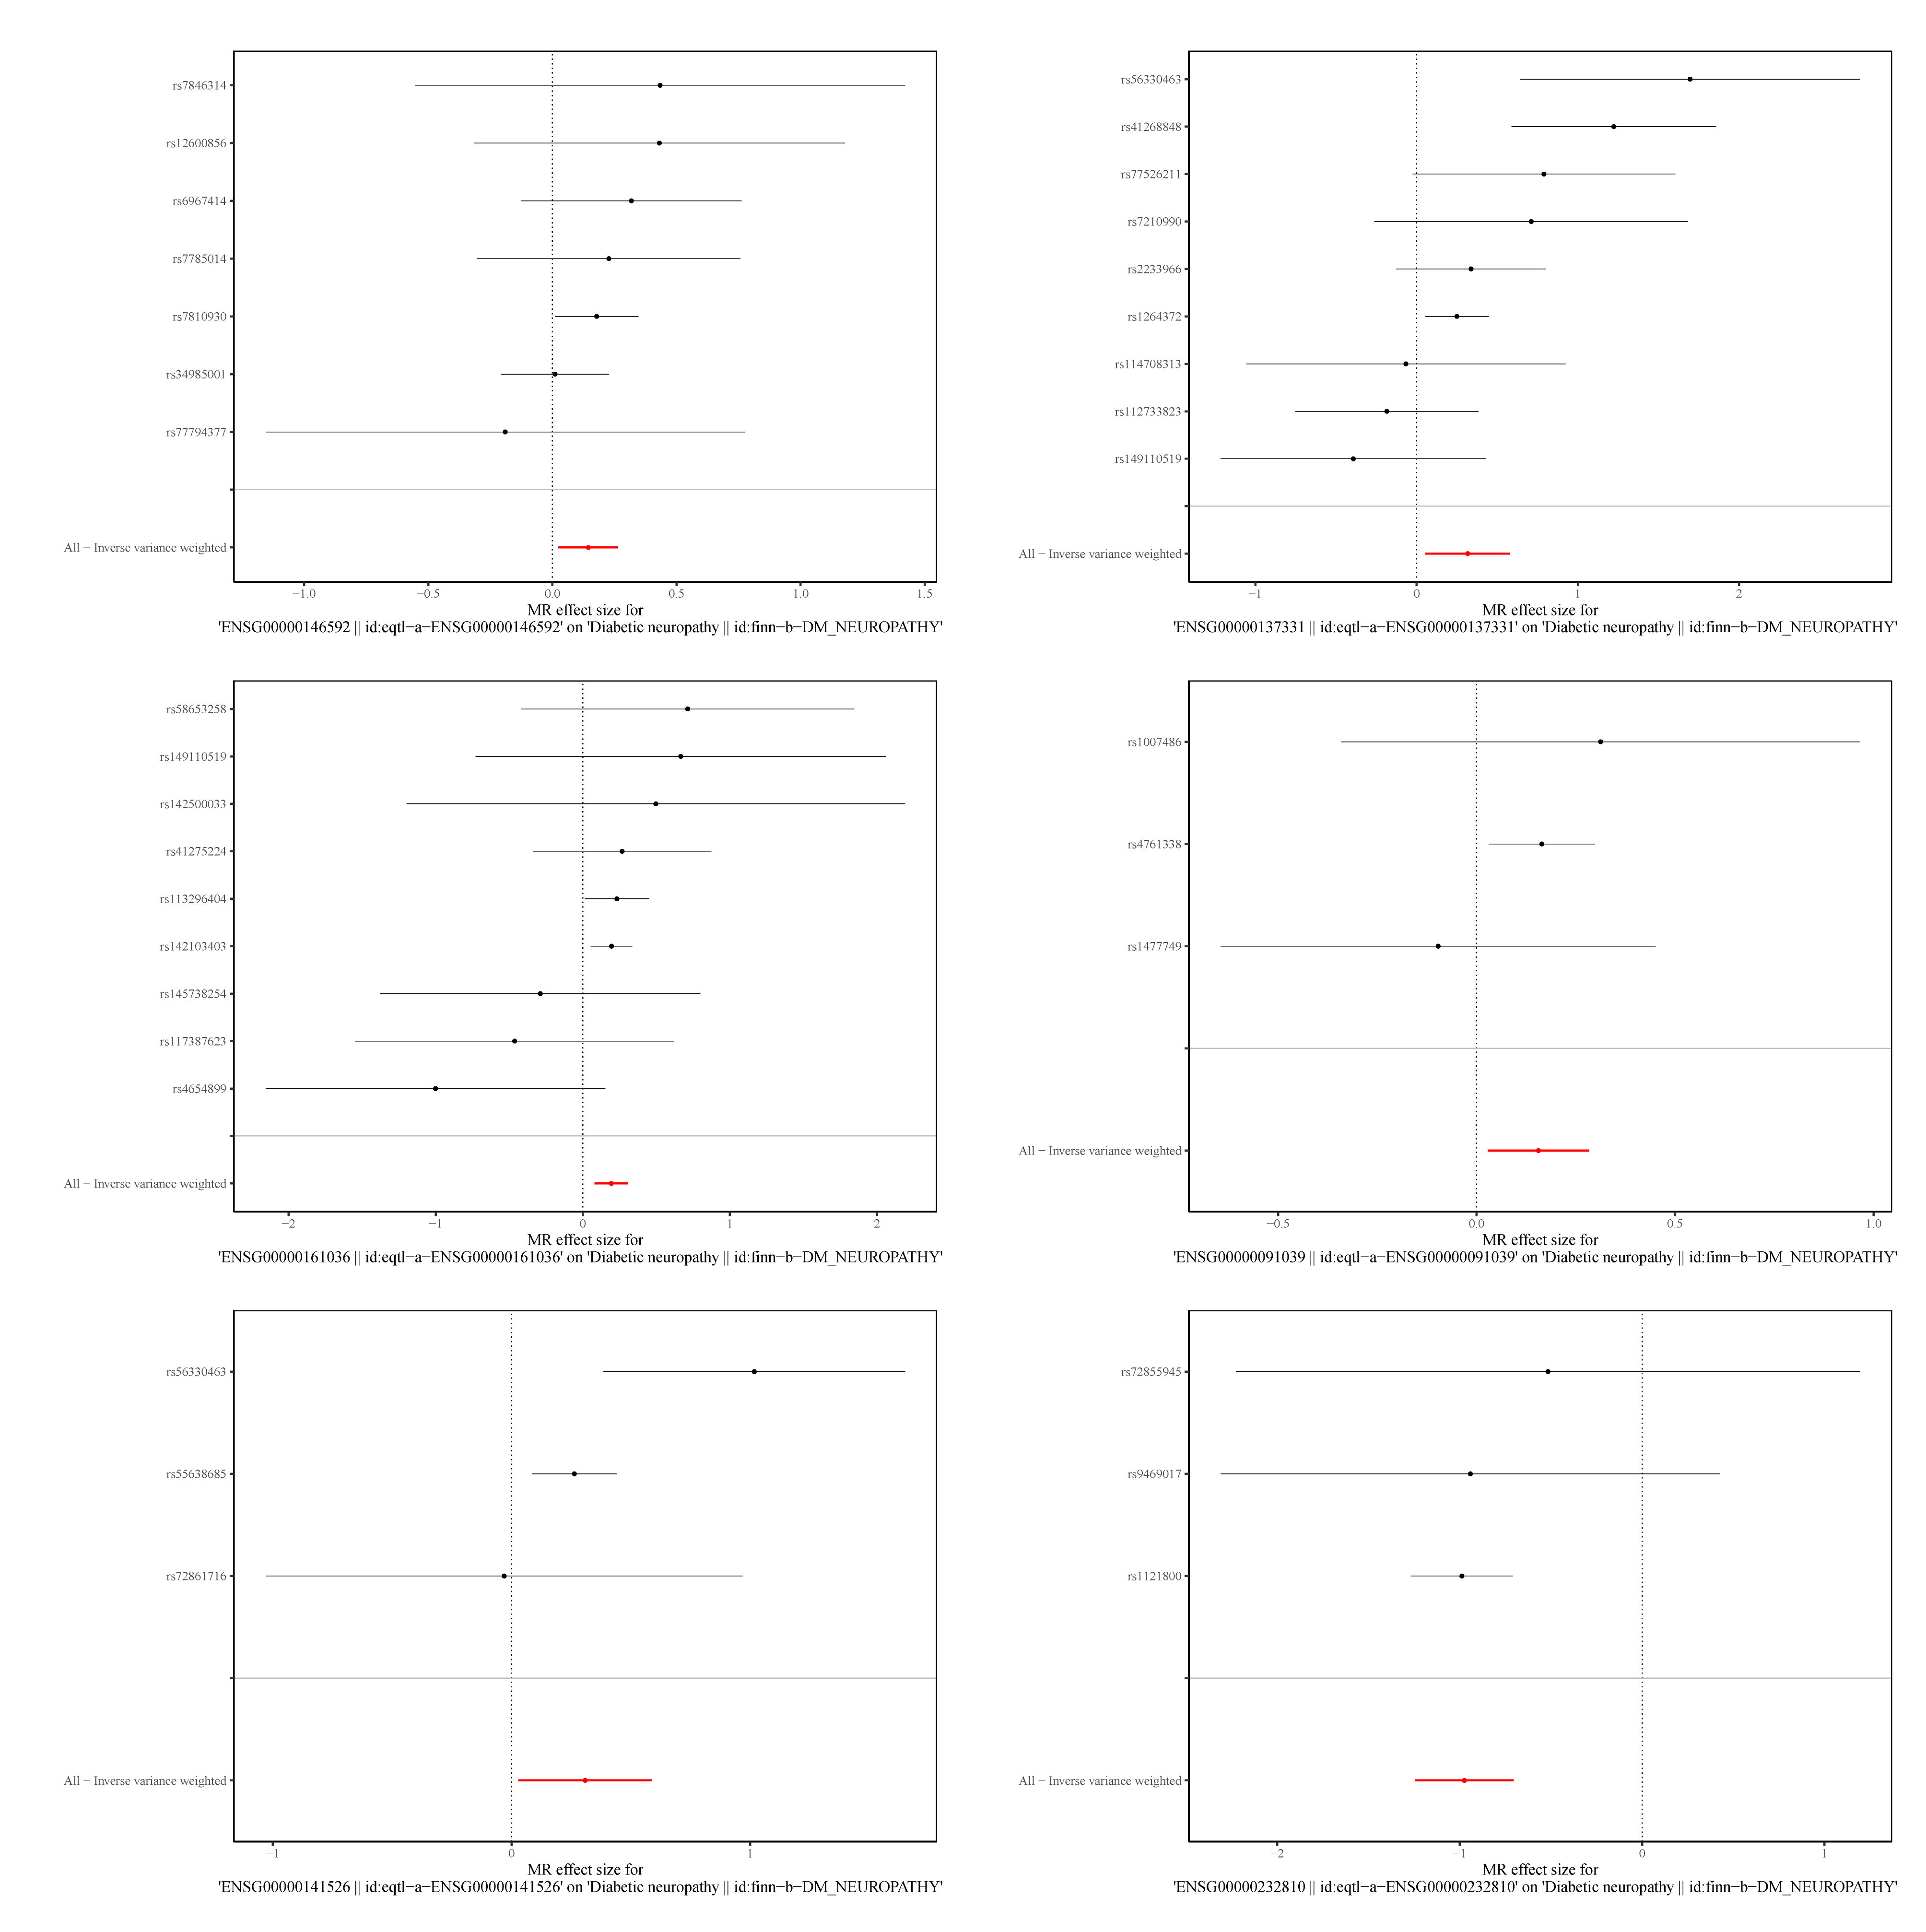


**Figure S2** The forest map resultst (CREB5, IER3, LRWD1, OSBPL8, SLC16A3,TNF).


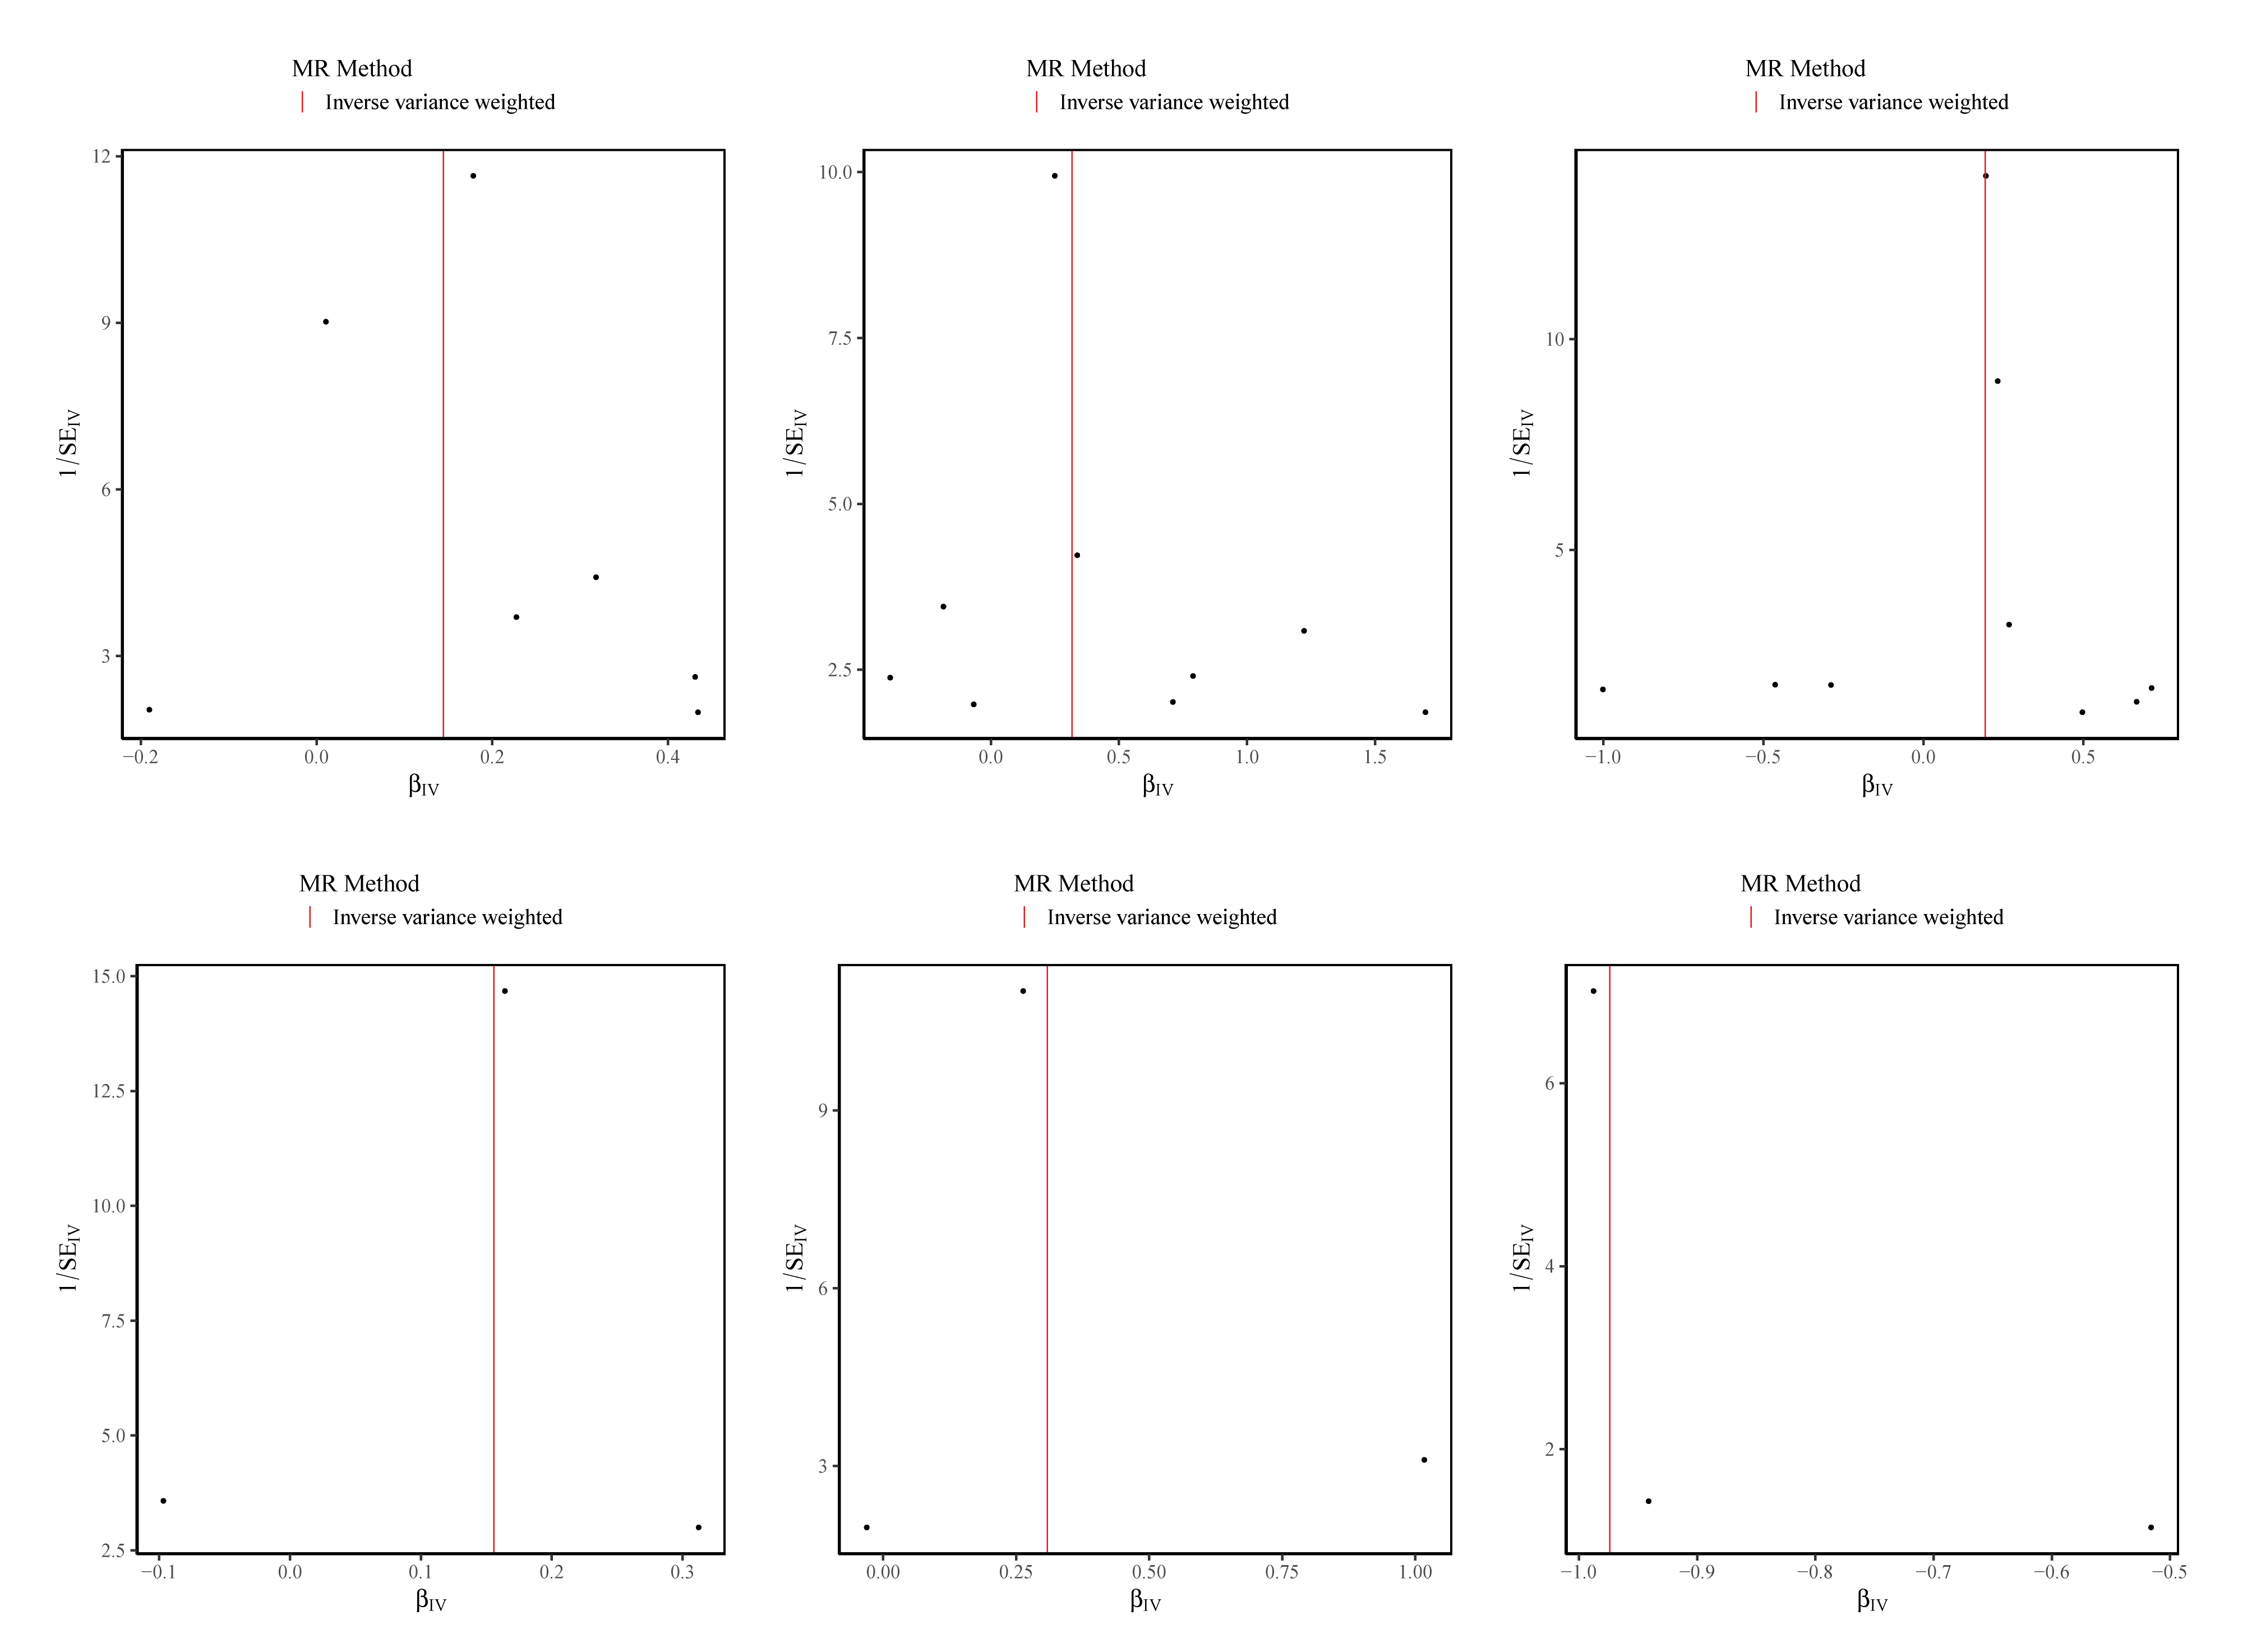


**Figure S3** The funnel plots to show the overall heterogeneity of forward MR analysis for the effect of biomarkers (CREB5, IER3, LRWD1, OSBPL8, SLC16A3,TNF) on DNP.


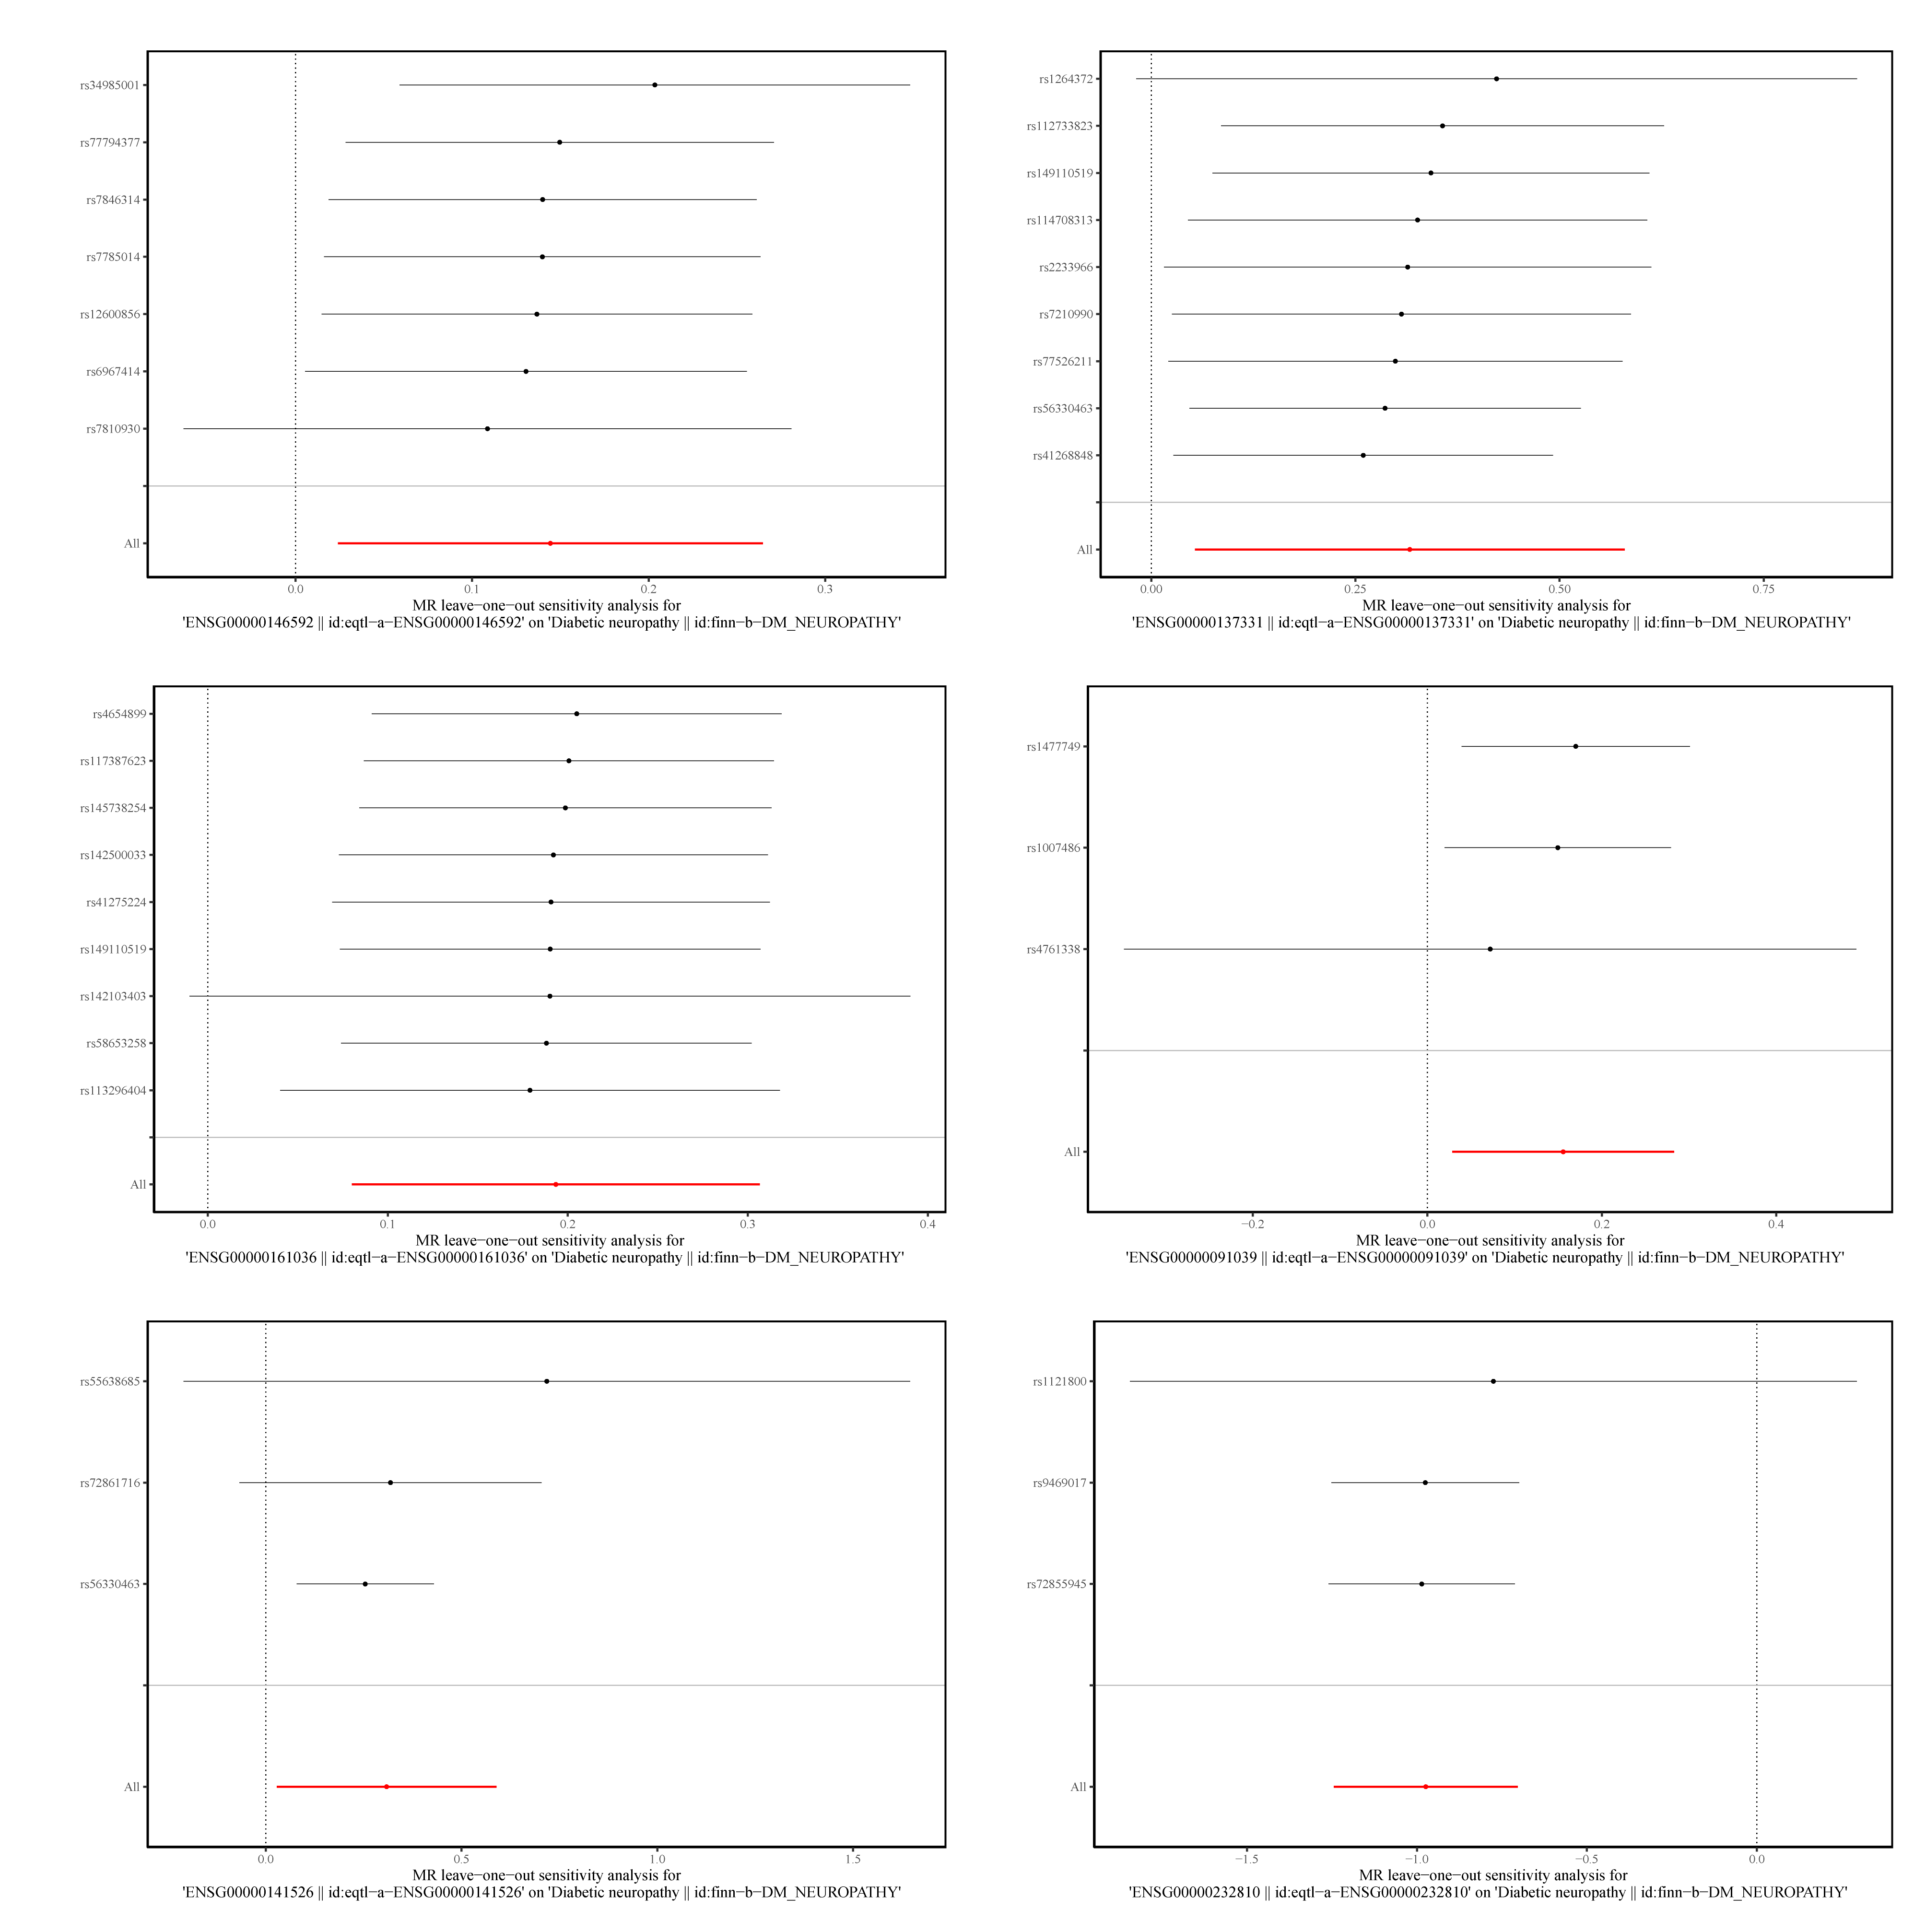


**Figure S4** The results of LOO analysis (CREB5, IER3, LRWD1, OSBPL8, SLC16A3,TNF).
